# Supplementary material for: Assessing the Appropriateness of Formulations on the WHO Model List of Essential Medicines for Children: Development of a Paediatric Quality Target Product Profile Tool
Source: Pharmaceutics. 2022 Feb 22;14(3):473. doi: 10.3390/pharmaceutics14030473 (PMC8950931; doi:10.3390/pharmaceutics14030473)
Supplement: Supplementary file 1 [file pharmaceutics-14-00473-s001.zip › pQTPP tool master blank Dec 2021.xlsx]

## Sheet: Product Name 1 (add)
Product Name:
EMLc Section(s):
Route of Administration:
Dosage Form:
Evaluation for WHO EMLc paediatric population, birth to 12 years.
Attribute	Result	Comparison to Target and Risk Assessment	Score	Additional considerations/information
Target population (age)			3
Dose and dose flexibility			1
Patient acceptability: 0-5 years			1
Patient acceptability: 6-12 years			2
Excipients safety			2
Administration considerations			3
Stability, storage conditions and primary packaging material			2
Registration status			3
Overall Conclusions
Risk Scores	No or insufficient information	0
	High risk/issues; does not meet target	1
	Moderate risk/issues; partially meets target	2
	Low risk/no issues; meets target	3
Date of review:
Prepared by:

## Sheet: Product Name 2 (add)
Product Name:
EMLc Section(s):
Route of Administration:
Dosage Form:
Evaluation for WHO EMLc paediatric population, birth to 12 years.
Attribute	Result	Comparison to Target and Risk Assessment	Score	Additional considerations/information
Target population (age)			3
Dose and dose flexibility			1
Patient acceptability: 0-5 years			1
Patient acceptability: 6-12 years			2
Excipients safety			2
Administration considerations			3
Stability, storage conditions and primary packaging material			2
Registration status			3
Overall Conclusions
Risk Scores	No or insufficient information	0
	High risk/issues; does not meet target	1
	Moderate risk/issues; partially meets target	2
	Low risk/no issues; meets target	3
Date of review:
Prepared by:

## Sheet: Summary
Product Names: Listed drug product names.
EMLc Section(s): EMLc section(s) in which drug is listed
Routes of Administration: Oral, IV, IM, SC, topical, rectal, pulmonary, nasal, ocular, aural etc.
Dosage forms: Tablet, capsule, dispersible tablet, chewable tablet, oral granules, oral powder, oral liquid, powder/granules for oral liquid/solution/suspension, injection, powder for injection, cream, ointment, lotion, gel, solution, nasal spray, eye drops, eye ointment etc.
SUMMARY
Provide a brief summary of the overall suitability/acceptability of the formulations available for this drug. Highlight any formulation gaps and/or recommendations.
Date of review:
Prepared by:

## Sheet: Information sources
Product Names: Listed drug product names.
EMLc Section(s): EMLc section(s) in which drug is listed
Routes of Administration: Oral, IV, IM, SC, topical, rectal, pulmonary, nasal, ocular, aural etc.
Dosage forms: Tablet, capsule, dispersible tablet, chewable tablet, oral granules, oral powder, oral liquid, powder/granules for oral liquid/solution/suspension, injection, powder for injection, cream, ointment, lotion, gel, solution, nasal spray, eye drops, eye ointment etc.
INFORMATION SOURCES
Add links or references to key information sources here.
Date of review:
Prepared by:

## Sheet: Definitions & Comments
Product Name: Listed drug product name. A separate tab should be used for different routes of administration, or where dosage forms significantly differ for the same route.
EMLc Section(s): EMLc section(s) in which drug is listed
Route of Administration: Oral, IV, IM, SC, topical, rectal, pulmonary, nasal, ocular, aural etc.
Dosage form: Tablet, capsule, dispersible tablet, chewable tablet, oral granules, oral powder, oral liquid, powder/granules for oral liquid/solution/suspension, injection, powder for injection, cream, ointment, lotion, gel, solution, nasal spray, eye drops, eye ointment etc.
Attribute	Targets	Comments
Target population (age)	Entire range 0 - ≤ 12 years.	Note, target population is for WHO EMLc; global paediatric regulations define the target population as 0- < 16/18 years, depending on territory. Ideally product should be suitable from birth although patient population age will depend upon the indication and drug (e.g. epidemiology, aetiology, safety and efficacy considerations). The drug product may be restricted to a paediatric age sub-set. If …
Dose and dose flexibility	Defined paediatric dose range and dose increments.	Product concentration/strength and format should allow correct and flexible dosing, according to patient age, weight, or body surface area. Dose banding may be possible.
Patient acceptability	Acceptable for the proposed patient population.	Depends on many factors including route of administration, dosage form and patient/caregiver characteristics (including age, disease, ability). Consider e.g., dose frequency and duration, size/volume of dose, palatability (oral), irritation or discomfort on administration (topical and parenteral), complexity of handling, packaging, cultural aspects. Dosage form must be suitable for use in the pro…
Excipients safety	Excipients with acceptable safety profile for the proposed patient population.	Evaluate considering benefit vs. risk if excipients are listed (e.g. on SmPCs/label). Details of product excipients may not be readily available, in which case consider potential risks associated the dosage form e.g. preservatives, sweeteners, surfactants, co-solvents etc for liquids, especially in neonates, infants, and young children.
Administration considerations	Required doses can be easily and accurately administered, with minimal preparation.	Evaluate according to setting (e.g. domiciliary vs. healthcare facility) and characteristics of individual administering the product. Administration device (if required) should be readily available and appropriate for the intended use, (e.g. able to measure and/or deliver the required doses accurately and easily). Multiple dilutions should be avoided. Guidance on compatible administration vehicle…
Stability, storage conditions and primary packaging material	Stable for 2 years minimum under long term storage conditions (ICH). Packaging suitable for hospital and/or home use, easy to use and unambiguous.	Evaluate pack and shelf life if available (e.g. SmPCs/label). Consider global climatic conditions. Refrigerated (2-8 °C) and freezer storage is less favourable. In-use shelf life should also be considered. Primary packaging should ideally light weight, portable and with child-resistant closure. If specific information on pack and shelf life is unavailable, consider potential pack options and stab…
Registration status	Positive opinion or approved by stringent regulatory authority.	Regulatory status and potential registration strategy (if required) to be considered. Prior approval can facilitate further/subsequent licence approvals and WHO pre-qualification.
Overall Conclusions
Provide a conclusion regarding the overall suitability of the product for use in paediatric patients (0-≤ 12 years) in LMICs. Briefly explain your judgment. Note, the product may be suitable for some patient sub-sets only, or for use in specified settings.
Judgement scores	No or insufficient information	0
	High risk/issues; does not meet target	1
	Moderate risk/issues; partially meets target	2
	Low risk/no issues; meets target	3
